# Supplementary material for: Dissipation, Metabolism, Accumulation, Processing and Risk Assessment of Fluopyram and Trifloxystrobin in Cucumbers and Cowpeas from Cultivation to Consumption
Source: MDPI journal article supplement (doi:10.3390/foods12102082), 2023-05-22
Supplement: s1 [file s1]

# **Dissipation, Metabolism, Accumulation, Processing and Risk Assessment of Fluopyram and Trifloxystrobin in Cucumbers and Cowpeas from Cultivation to Consumption**

Kai Cui <sup>1</sup>, Shuai Guan <sup>1</sup>, Jingyun Liang <sup>1</sup>, Liping Fang <sup>1</sup>, Ruiyan Ding <sup>1</sup>, Jian Wang <sup>1</sup>, Teng Li <sup>1</sup>, Zhan Dong <sup>1,\*</sup>, Xiaohu Wu <sup>2</sup> and Yongquan Zheng <sup>2</sup>

<sup>1</sup> Institute of Quality Standard and Testing Technology for Agro-Products, Shandong Academy of Agricultural Sciences, Shandong Provincial Key Laboratory of Test Technology on Food Quality and Safety, Jinan 250100, China

<sup>2</sup> Institute of Plant Protection, Chinese Academy of Agricultural Sciences, Beijing 100193, China

\*Correspondence: zhandongsaas@163.com

**Table S1.** Retention time and MRM parameters of FLU and TRI and their metabolites FLB and TRA for HPLC-MS/MS detection.

**Table S2.** Detailed parameters/exposure factors for human health risk assessment.

**Table S3.** The calibration regression equation,  $R^2$ , ME, and LOQ for FLU and TRI and their metabolites FLB and TRA in different matrices.

**Table S4.** Residue levels of FLU and TRI and their metabolites FLB and TRA in cucumbers and cowpeas for the different processing operations.

**Table S5.** Total FLU and TRI residues (expressed as FLU<sub>sum</sub> and TRI<sub>sum</sub>) at different sampling intervals and MRLs for different countries.

**Table S1.** Retention time and MRM parameters of FLU and TRI and their metabolites FLB and TRA for HPLC-MS/MS detection.

| Pesticide<br>s | Chemical<br>formula                                                          | Retention<br>time<br>(min) | Quantitative<br>ion<br>(m/z) | Qualitative<br>ion<br>(m/z) | Fragmentor<br>(V) | CE (V)<br>Quan/qual |
|----------------|------------------------------------------------------------------------------|----------------------------|------------------------------|-----------------------------|-------------------|---------------------|
| FLU            | C <sub>16</sub> H <sub>11</sub> ClF <sub>6</sub> N <sub>2</sub> O            | 2.951                      | 397/173                      | 397/207.9                   | 166               | 40/20               |
| FLB            | C <sub>8</sub> H <sub>6</sub> F <sub>3</sub> NO                              | 1.942                      | 190/130                      | 190/102                     |                   | 20/35               |
| TRI            | C <sub>20</sub> H <sub>19</sub> F <sub>3</sub> N <sub>2</sub> O <sub>4</sub> | 3.297                      | 409.14/186                   | 409.14/145                  |                   | 20/60               |
| TRA            | C <sub>19</sub> H <sub>17</sub> F <sub>3</sub> N <sub>2</sub> O <sub>4</sub> | 3.038                      | 395/186                      | 395/148                     |                   | 19/11               |

**Table S2.** Detailed parameters/exposure factors for human health risk assessment.

| Exposure factors | Unit       | Adults | Children |
|------------------|------------|--------|----------|
| F (cucumber)     | g/d        | 32.10  | 32.10    |
| F (cowpea)       | g/d        | 7.22   | 7.22     |
| LP (cucumber)    | g/d        | 424.69 | 212.11   |
| LP (cowpea)      | g/d        | 507.58 | 203.31   |
| bw               | kg         | 53.23  | 16.14    |
| v                |            |        | 3        |
| ADI (FLU)        | µg/kg bw/d |        | 10       |
| ADI (TRI)        | µg/kg bw/d |        | 40       |
| ARfD (FLU)       | µg/kg bw/d |        | 500      |
| ARfD (TRI)       | µg/kg bw/d |        | -        |

**Table S3.** The calibration regression equation, R<sup>2</sup>, ME and LOQ for FLU and TRI and their metabolites FLB and TRA in different matrices.

| Pesticides | Matrix               | Regression equation       | R2     | ME(%)  | LOQ<br>(µg/kg) |
|------------|----------------------|---------------------------|--------|--------|----------------|
| FLU        | acetonitrile         | y = 9427.21 x + 88415.52  | 0.9976 | -      | 1              |
|            | cucumber             | y = 8822.94 x + 17101.50  | 0.9994 | -6.41  | 1              |
|            | boiling cucumber     | y = 9199.76 x + 15802.46  | 0.9993 | -2.41  | 1              |
|            | pickling cucumber    | y = 8816.14 x + 6850.50   | 0.9994 | -6.48  | 1              |
|            | stir-frying cucumber | y = 9219.29 x + 9797.88   | 0.9993 | -2.21  | 1              |
|            | cucumber skin        | y = 9407.08 x + 2645.41   | 0.9970 | -0.21  | 1              |
|            | cucumber pulp        | y = 10935.16 x + 7981.78  | 1      | 16.00  | 1              |
|            | cowpea               | y = 6213.87 x + 4086.91   | 0.9996 | -34.09 | 1              |
|            | boiling cowpea       | y = 5556.25 x + 2626.16   | 0.9996 | -41.06 | 1              |
|            | pickling cowpea      | y = 6198.98 x + 4771.19   | 0.9994 | -34.24 | 1              |
|            | stir-frying cowpea   | y = 5582.53 x + 3024.49   | 0.9992 | -40.78 | 1              |
|            | acetonitrile         | y = 2725.10 x + 3139.91   | 0.9995 | -      | 1              |
| FLB        | cucumber             | y = 2458.89 x + 1661.14   | 0.9996 | -9.77  | 1              |
|            | boiling cucumber     | y = 2478.55 x + 940.91    | 0.9995 | -9.05  | 1              |
|            | pickling cucumber    | y = 2428.31 x + 1967.05   | 0.9994 | -10.89 | 1              |
|            | stir-frying cucumber | y = 2454.34 x + 1239.23   | 0.9994 | -9.94  | 1              |
|            | cucumber skin        | y = 2422.60 x - 6425.37   | 0.9969 | -11.10 | 1              |
|            | cucumber pulp        | y = 2652.23 x + 227.79    | 0.9999 | -2.67  | 1              |
|            | cowpea               | y = 1940.19 x + 1698.81   | 0.9995 | -28.80 | 1              |
|            | boiling cowpea       | y = 1839.92 x + 1636.48   | 0.9992 | -32.48 | 1              |
|            | pickling cowpea      | y = 1953.22 x + 2241.30   | 0.9994 | -28.32 | 1              |
|            | stir-frying cowpea   | y = 1850.11 x + 2407.90   | 0.9990 | -32.11 | 1              |
|            | acetonitrile         | y = 16904.44 x + 31997.16 | 0.9943 | -      | 1              |
|            | cucumber             | y = 9351.69 x + 15165.34  | 0.9996 | -44.68 | 1              |
| TRI        | boiling cucumber     | y = 10790.52 x + 11351.66 | 0.9996 | -36.17 | 1              |
|            | pickling cucumber    | y = 9090.54 x + 11264.65  | 0.9994 | -46.22 | 1              |
|            | stir-frying cucumber | y = 10545.37 x + 8142.09  | 0.9995 | -37.62 | 1              |
|            | cucumber skin        | y = 9712.44 x - 14278.99  | 0.9979 | -42.55 | 1              |
|            | cucumber pulp        | y = 13228.03 x + 1837.24  | 1      | -21.75 | 1              |
|            | cowpea               | y = 3780.36 x + 11285.26  | 0.9979 | -77.64 | 1              |
|            | boiling cowpea       | y = 3709.41 x + 3434.91   | 0.9989 | -78.06 | 1              |
|            | pickling cowpea      | y = 3480.58 x + 6978.70   | 0.9980 | -79.41 | 1              |
|            | stir-frying cowpea   | y = 3641.20 x - 1791.26   | 0.9985 | -78.46 | 1              |
|            | acetonitrile         | y = 6017.56 x - 2615.56   | 0.9997 | -      | 1              |
|            | cucumber             | y = 6275.75 x + 1738.30   | 1      | 4.29   | 1              |
|            | boiling cucumber     | y = 6506.48 x - 390.80    | 0.9997 | 8.12   | 1              |
| TRA        | pickling cucumber    | y = 6201.46 x + 967.47    | 1      | 3.06   | 1              |
|            | stir-frying cucumber | y = 6429.20 x - 91.23     | 0.9999 | 6.84   | 1              |
|            | cucumber skin        | y = 4753.95 x - 12121.17  | 0.9970 | -21.00 | 1              |

|                    |                           |        |        |   |
|--------------------|---------------------------|--------|--------|---|
| cucumber pulp      | $y = 5210.86 x - 3220.04$ | 0.9998 | -13.41 | 1 |
| cowpea             | $y = 4403.92 x + 4941.56$ | 0.9997 | -26.82 | 1 |
| boiling cowpea     | $y = 4370.56 x + 675.12$  | 0.9999 | -27.37 | 1 |
| pickling cowpea    | $y = 4490.29 x + 532.11$  | 0.9998 | -25.38 | 1 |
| stir-frying cowpea | $y = 4388.09 x - 549.12$  | 0.9997 | -27.08 | 1 |

**Table S4.** Residue levels of FLU and TRI and their metabolites FLB and TRA in cucumbers and cowpeas for the different processing operations.

| Processing               | FLU in cucumbers                |                | FLU in cowpeas                  |                | TRI in cucumbers                |                | TRI in cowpeas                  |                | FLB in cowpeas                  |                | TRA in cucumbers                |                | TRA in cowpeas                  |                |
|--------------------------|---------------------------------|----------------|---------------------------------|----------------|---------------------------------|----------------|---------------------------------|----------------|---------------------------------|----------------|---------------------------------|----------------|---------------------------------|----------------|
|                          | Residue<br>( $\mu\text{g/kg}$ ) | Removal<br>(%) |
| <b>Before processing</b> | 287.08 $\pm$ 13.51              | -              | 2477.05 $\pm$ 19.56             | -              | 235.66 $\pm$ 7.01               | -              | 2205.03 $\pm$ 186.80            | -              | 5.61 $\pm$ 0.22                 | -              | 20.51 $\pm$ 1.47                | -              | 106.13 $\pm$ 6.10               | -              |
| <b>Peeling</b>           |                                 | -              | -                               | -              |                                 | -              | -                               | -              | -                               | -              |                                 | -              | -                               | -              |
| Skins                    | 581.07 $\pm$ 7.21               | -              | -                               | -              | 457.95 $\pm$ 20.12              | -              | -                               | -              | -                               | -              | 42.54 $\pm$ 1.22                | -              | -                               | -              |
| Pulps                    | 85.95 $\pm$ 6.33                | 70.06          | -                               | -              | 55.61 $\pm$ 3.50                | 76.40          | -                               | -              | -                               | -              | 2.71 $\pm$ 0.28                 | 86.80          | -                               | -              |
| <b>Washing</b>           |                                 |                |                                 |                |                                 |                |                                 |                |                                 |                |                                 |                |                                 |                |
| 1 min                    | 221.10 $\pm$ 4.27               | 22.98          | 1518.01 $\pm$ 16.01             | 38.72          | 213.25 $\pm$ 9.08               | 9.51           | 2138.66 $\pm$ 125.59            | 3.01           | 3.28 $\pm$ 0.22                 | 41.59          | 22.69 $\pm$ 1.33                | -              | 80.19 $\pm$ 7.47                | 24.44          |
| 3 min                    | 159.15 $\pm$ 8.57               | 44.56          | 1434.27 $\pm$ 21.68             | 42.10          | 121.71 $\pm$ 2.50               | 48.35          | 1528.29 $\pm$ 52.97             | 30.69          | 3.81 $\pm$ 0.51                 | 32.16          | 18.45 $\pm$ 1.63                | 10.07          | 56.67 $\pm$ 1.47                | 46.61          |
| 5 min                    | 139.27 $\pm$ 8.81               | 51.49          | 1166.29 $\pm$ 61.53             | 52.92          | 93.33 $\pm$ 5.68                | 60.39          | 1482.78 $\pm$ 15.25             | 32.75          | 3.04 $\pm$ 0.10                 | 45.81          | 14.53 $\pm$ 0.68                | 29.15          | 47.8 $\pm$ 4.82                 | 54.96          |
| 7 min                    | 134.55 $\pm$ 1.72               | 53.13          | 1012.15 $\pm$ 7.92              | 59.14          | 83.74 $\pm$ 2.19                | 64.47          | 1537.56 $\pm$ 77.51             | 30.27          | 4.01 $\pm$ 0.52                 | 28.52          | 13.80 $\pm$ 0.30                | 32.74          | 45.77 $\pm$ 3.29                | 56.88          |
| 10 min                   | 108.20 $\pm$ 5.87               | 62.31          | 832.32 $\pm$ 15.85              | 66.40          | 70.68 $\pm$ 2.92                | 70.01          | 951.66 $\pm$ 67.43              | 56.84          | 2.30 $\pm$ 0.31                 | 58.95          | 12.81 $\pm$ 0.73                | 37.54          | 40.96 $\pm$ 1.45                | 61.41          |
| <b>Stir-frying</b>       |                                 |                |                                 |                |                                 |                |                                 |                |                                 |                |                                 |                |                                 |                |
| 1 min                    | 84.44 $\pm$ 0.51                | 70.59          | 1521.52 $\pm$ 15.48             | 38.58          | 29.18 $\pm$ 0.89                | 87.62          | 1205.64 $\pm$ 18.58             | 45.32          | 4.82 $\pm$ 0.29                 | 14.10          | 9.39 $\pm$ 0.05                 | 54.22          | 22.53 $\pm$ 2.70                | 78.77          |
| 3 min                    | 99.00 $\pm$ 1.89                | 65.52          | 1520.15 $\pm$ 30.1              | 38.63          | 29.97 $\pm$ 1.59                | 87.28          | 1272.19 $\pm$                   | 42.30          | 5.18 $\pm$ 0.14                 | 7.74           | 6.91 $\pm$ 0.11                 | 66.30          | 29.54 $\pm$ 0.86                | 72.16          |

|                 |             |       |                    |       |                  |       |                    |       |           |       |            |       |             |       |  |
|-----------------|-------------|-------|--------------------|-------|------------------|-------|--------------------|-------|-----------|-------|------------|-------|-------------|-------|--|
|                 |             |       | 1                  |       |                  |       | 28.01              |       |           |       |            |       |             |       |  |
| 5 min           | 129.71±5.01 | 54.82 | 1608.19±31.0<br>1  | 35.08 | 41.92±3.89       | 82.21 | 1596.99±<br>123.14 | 27.57 | 5.50±0.43 | 1.89  | 8.39±0.24  | 59.08 | 28.82±0.59  | 72.85 |  |
| 7 min           | 148.97±7.18 | 48.11 | 1714.46±61.5<br>8  | 30.79 | 64.76±2.88       | 72.52 | 1597.43±<br>86.05  | 27.56 | 6.58±0.13 | -     | 7.25±0.25  | 64.66 | 34.92±0.50  | 67.10 |  |
| 10 min          | 167.70±5.98 | 41.59 | 1832.05±159.<br>48 | 26.04 | 110.27±<br>14.09 | 53.21 | 1692.05±<br>56.95  | 23.26 | 6.91±0.48 | -     | 5.95±0.53  | 70.98 | 41.16±3.81  | 61.21 |  |
| <b>Boiling</b>  |             |       |                    |       |                  |       |                    |       |           |       |            |       |             |       |  |
| 1 min           | 252.96±3.36 | 11.89 | 1464.72±14.6<br>8  | 40.87 | 196.16±<br>23.33 | 16.76 | 1710.94±<br>86.83  | 22.41 | 4.68±0.12 | 16.61 | 6.31±0.19  | 69.24 | 35.32±3.54  | 66.72 |  |
| 3 min           | 213.45±0.76 | 25.65 | 1164.14±17.1<br>4  | 53.00 | 134.47±<br>10.52 | 42.94 | 1420.99±<br>33.31  | 35.56 | 5.11±0.19 | 8.83  | 10.77±0.14 | 47.50 | 31.63±2.02  | 70.20 |  |
| 5 min           | 195.14±6.09 | 32.03 | 1058.60±49.8<br>4  | 57.26 | 152.28±9.17      | 35.38 | 1373.98±<br>103.03 | 37.69 | 5.65±0.16 | -     | 8.91±0.25  | 56.54 | 27.34±1.88  | 74.24 |  |
| 7 min           | 195.29±2.26 | 31.97 | 1150.24±49.3<br>2  | 53.56 | 110.06±1.47      | 53.30 | 1000.93±<br>27.33  | 54.61 | 5.84±0.24 | -     | 8.41±0.34  | 58.99 | 23.54±1.04  | 77.82 |  |
| 10 min          | 162.47±4.29 | 43.41 | 1147.27±103.<br>99 | 53.68 | 100.69±7.09      | 57.27 | 782.83±<br>82.82   | 64.50 | 4.98±0.43 | 11.28 | 9.01±0.14  | 56.06 | 20.44±0.31  | 80.74 |  |
| <b>Pickling</b> |             |       |                    |       |                  |       |                    |       |           |       |            |       |             |       |  |
| 2h              | 235.56±3.58 | 17.95 | 1281.28±26.3<br>1  | 48.27 | 175.19±5.00      | 25.66 | 1546.73±<br>17.65  | 29.85 | 3.08±0.04 | 45.03 | 32.65±0.28 | -     | 143.2±1.21  | -     |  |
| 1 d             | 128.29±3.06 | 55.31 | 1201.20±34.5<br>5  | 51.51 | 110.14±0.91      | 53.26 | 1276.99±<br>36.64  | 42.09 | 2.18±0.15 | 61.13 | 29.68±0.47 | -     | 171.72±2.04 | -     |  |
| 3 d             | 132.12±0.97 | 53.98 | 1243.09±7.59       | 49.82 | 116.45±2.68      | 50.59 | 1237.72±<br>71.73  | 43.87 | 1.41±0.06 | 74.84 | 28.50±0.49 | -     | 219.78±5.94 | -     |  |
| 5 d             | 135.16±3.86 | 52.92 | 1249.29±10.5       | 49.57 | 115.20±5.59      | 51.11 | 1211.02±           | 45.08 | <LOQ      | -     | 35.06±1.07 | -     | 267.48±9.17 | -     |  |

|      |              |       |              |       |             |       |          |       |      |   |            |   |         |   |
|------|--------------|-------|--------------|-------|-------------|-------|----------|-------|------|---|------------|---|---------|---|
|      |              |       | 0            |       |             |       | 97.35    |       |      |   |            |   |         |   |
| 7 d  | 144.11±1.26  | 49.80 | 1735.08±28.8 | 29.95 | 118.80±2.29 | 49.59 | 1595.62± | 27.64 | <LOQ | - | 47.96±0.31 | - | 479.86± | - |
|      |              |       | 3            |       |             |       | 124.66   |       |      |   |            |   | 21.43   |   |
| 14 d | 153.76± 5.75 | 46.44 | 1844.20±144. | 25.55 | 114.82±4.50 | 51.28 | 1901.36± | 13.77 | <LOQ | - | 56.05±3.47 | - | 574.15± | - |
|      |              |       | 63           |       |             |       | 122.72   |       |      |   |            |   | 24.33   |   |

---



**Table S5.** Total FLU and TRI residues (expressed as FLU<sub>sum</sub> and TRI<sub>sum</sub>) at different sampling intervals and MRLs for different countries.

|                  | Time | Total residues (µg/kg) |         |         | MRLs (µg/kg) |      |      |      |       |       |
|------------------|------|------------------------|---------|---------|--------------|------|------|------|-------|-------|
|                  |      | Average                | STMR    | HR      | China        | CAC  | US   | EU   | Japan | Korea |
| FLU in cucumbers |      |                        |         |         |              |      |      |      |       |       |
| 1st spraying     | 2 h  | 106.15                 | 106.34  | 108.45  |              |      |      |      |       |       |
|                  | 1 d  | 107.65                 | 107.44  | 110.40  |              |      |      |      |       |       |
|                  | 3 d  | 55.30                  | 55.13   | 57.44   |              |      |      |      |       |       |
|                  | 5 d  | 54.79                  | 54.85   | 56.07   |              |      |      |      |       |       |
|                  | 7 d  | 21.96                  | 22.14   | 22.48   |              |      |      |      |       |       |
| 2nd spraying     | 2 h  | 226.41                 | 227.06  | 229.63  |              |      |      |      |       |       |
|                  | 1 d  | 195.63                 | 195.91  | 206.12  |              |      |      |      |       |       |
|                  | 3 d  | 197.63                 | 197.92  | 221.05  | 500          | 500  | 600  | 600  | 600   | 1000  |
|                  | 5 d  | 172.60                 | 171.98  | 182.55  |              |      |      |      |       |       |
|                  | 7 d  | 120.85                 | 120.77  | 123.75  |              |      |      |      |       |       |
| 3rd spraying     | 2 h  | 215.19                 | 214.73  | 218.55  |              |      |      |      |       |       |
|                  | 1 d  | 248.17                 | 250.14  | 253.21  |              |      |      |      |       |       |
|                  | 3 d  | 209.94                 | 209.79  | 214.60  |              |      |      |      |       |       |
|                  | 5 d  | 152.52                 | 153.40  | 154.02  |              |      |      |      |       |       |
|                  | 7 d  | 157.74                 | 157.61  | 159.01  |              |      |      |      |       |       |
| FLU in cowpeas   |      |                        |         |         |              |      |      |      |       |       |
| 1st spraying     | 2 h  | 1341.60                | 1343.75 | 1396.01 |              |      |      |      |       |       |
|                  | 1 d  | 1216.37                | 1214.13 | 1251.53 |              |      |      |      |       |       |
|                  | 3 d  | 1180.10                | 1172.05 | 1230.61 | 1000         | 1000 | 4000 | 3000 | -     | -     |
|                  | 5 d  | 1050.42                | 1051.87 | 1055.63 |              |      |      |      |       |       |
|                  | 7 d  | 878.55                 | 881.55  | 902.73  |              |      |      |      |       |       |

|                         |     |         |         |         |     |     |     |     |     |     |
|-------------------------|-----|---------|---------|---------|-----|-----|-----|-----|-----|-----|
|                         | 2 h | 2343.05 | 2349.95 | 2355.32 |     |     |     |     |     |     |
|                         | 1 d | 2144.15 | 2145.02 | 2182.40 |     |     |     |     |     |     |
| 2nd spraying            | 3 d | 2134.03 | 2125.09 | 2175.67 |     |     |     |     |     |     |
|                         | 5 d | 2132.91 | 2113.35 | 2195.01 |     |     |     |     |     |     |
|                         | 7 d | 1631.10 | 1631.41 | 1638.99 |     |     |     |     |     |     |
|                         | 2 h | 3260.36 | 3260.85 | 3281.96 |     |     |     |     |     |     |
|                         | 1 d | 2232.33 | 2217.92 | 2329.79 |     |     |     |     |     |     |
| 3rd spraying            | 3 d | 2214.06 | 2216.17 | 2249.02 |     |     |     |     |     |     |
|                         | 5 d | 2168.87 | 2161.69 | 2212.06 |     |     |     |     |     |     |
|                         | 7 d | 2113.08 | 2104.89 | 2170.49 |     |     |     |     |     |     |
| <b>TRI in cucumbers</b> |     |         |         |         |     |     |     |     |     |     |
|                         | 2 h | 113.69  | 113.34  | 121.99  |     |     |     |     |     |     |
|                         | 1 d | 118.10  | 117.69  | 127.58  |     |     |     |     |     |     |
| 1st spraying            | 3 d | 65.93   | 65.75   | 69.36   |     |     |     |     |     |     |
|                         | 5 d | 52.34   | 52.74   | 53.17   |     |     |     |     |     |     |
|                         | 7 d | 20.44   | 20.32   | 22.04   |     |     |     |     |     |     |
|                         | 2 h | 230.31  | 231.62  | 241.82  |     |     |     |     |     |     |
|                         | 1 d | 168.31  | 167.90  | 171.57  |     |     |     |     |     |     |
| 2nd spraying            | 3 d | 194.29  | 191.80  | 204.53  | 300 | 300 | 500 | 300 | 700 | 500 |
|                         | 5 d | 92.06   | 91.94   | 94.48   |     |     |     |     |     |     |
|                         | 7 d | 108.61  | 107.19  | 115.40  |     |     |     |     |     |     |
|                         | 2 h | 245.48  | 245.73  | 254.97  |     |     |     |     |     |     |
|                         | 1 d | 259.63  | 258.67  | 277.61  |     |     |     |     |     |     |
| 3rd spraying            | 3 d | 214.59  | 215.53  | 238.22  |     |     |     |     |     |     |
|                         | 5 d | 152.94  | 153.29  | 161.45  |     |     |     |     |     |     |
|                         | 7 d | 135.98  | 134.03  | 149.50  |     |     |     |     |     |     |

| TRI in cowpeas |     |         |         |         |   |   |      |      |   |
|----------------|-----|---------|---------|---------|---|---|------|------|---|
| 1st spraying   | 2 h | 1592.24 | 1559.61 | 1796.70 |   |   |      |      |   |
|                | 1 d | 1402.04 | 1398.38 | 1435.80 |   |   |      |      |   |
|                | 3 d | 1251.89 | 1263.32 | 1272.13 |   |   |      |      |   |
|                | 5 d | 1288.79 | 1292.62 | 1358.86 |   |   |      |      |   |
|                | 7 d | 1168.93 | 1141.32 | 1342.91 |   |   |      |      |   |
| 2nd spraying   | 2 h | 2679.22 | 2677.12 | 2806.77 |   |   |      |      |   |
|                | 1 d | 2257.34 | 2249.29 | 2332.58 |   |   |      |      |   |
|                | 3 d | 2245.24 | 2238.47 | 2366.34 | - | - | 1500 | 1500 | - |
|                | 5 d | 2251.35 | 2245.16 | 2315.84 |   |   |      |      |   |
|                | 7 d | 2004.10 | 2008.59 | 2077.21 |   |   |      |      |   |
| 3rd spraying   | 2 h | 3613.37 | 3620.67 | 3695.32 |   |   |      |      |   |
|                | 1 d | 2725.25 | 2717.57 | 2817.48 |   |   |      |      |   |
|                | 3 d | 2479.15 | 2485.29 | 2521.95 |   |   |      |      |   |
|                | 5 d | 2326.64 | 2320.67 | 2372.12 |   |   |      |      |   |
|                | 7 d | 2176.81 | 2155.65 | 2285.72 |   |   |      |      |   |
